# Supplementary material for: Sequential Extraction of Hydroxytyrosol, Mannitol and Triterpenic Acids Using a Green Optimized Procedure Based on Ultrasound
Source: MDPI journal article supplement (doi:10.3390/antiox10111781), 2021-11-07
Supplement: s1 [file s1]

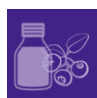

## Article

# Sequential Extraction of Hydroxytyrosol, Mannitol and Triterpenic Acids Using a Green Optimized Procedure Based on Ultrasound

Irene Gómez-Cruz<sup>1,2</sup>, María del Mar Contreras<sup>1,2\*</sup>, Inmaculada Romero<sup>1,2</sup> and Eulogio Castro<sup>1,2</sup>

<sup>1</sup> Department of Chemical, Environmental and Materials Engineering, Universidad de Jaén, Campus Las Lagunillas, 23071 Jaén, Spain.

<sup>2</sup> Centre for Advanced Studies in Earth Sciences, Energy and Environment (CEACTEMA), Universidad de Jaén, Campus Las Lagunillas, 23071 Jaén, Spain.

\* Correspondence: mcgamez@ujaen.es

## Supplementary materials

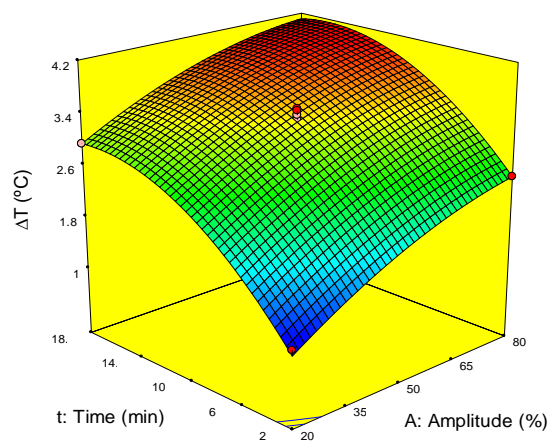

**Citation:** Lastname, F.; Lastname, F.; Lastname, F. Title. *Antioxidants* **2021**, *10*, 1781. <https://doi.org/10.3390/antiox10111781>

Academic Editor: Firstname Last-name

Received: date

Accepted: date

Published: date

**Publisher's Note:** MDPI stays neutral with regard to jurisdictional claims in published maps and institutional affiliations.

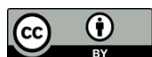

**Copyright:** © 2021 by the authors. Submitted for possible open access publication under the terms and conditions of the Creative Commons Attribution (CC BY) license (<https://creativecommons.org/licenses/by/4.0/>).

**Figure S1.** Response surface plot for the increment of temperature as function of the time and amplitude (solid loading was fixed at 8.5%, w/v) in the Box–Behnken design for the ultrasound-assisted water extraction of exhausted olive pomace.

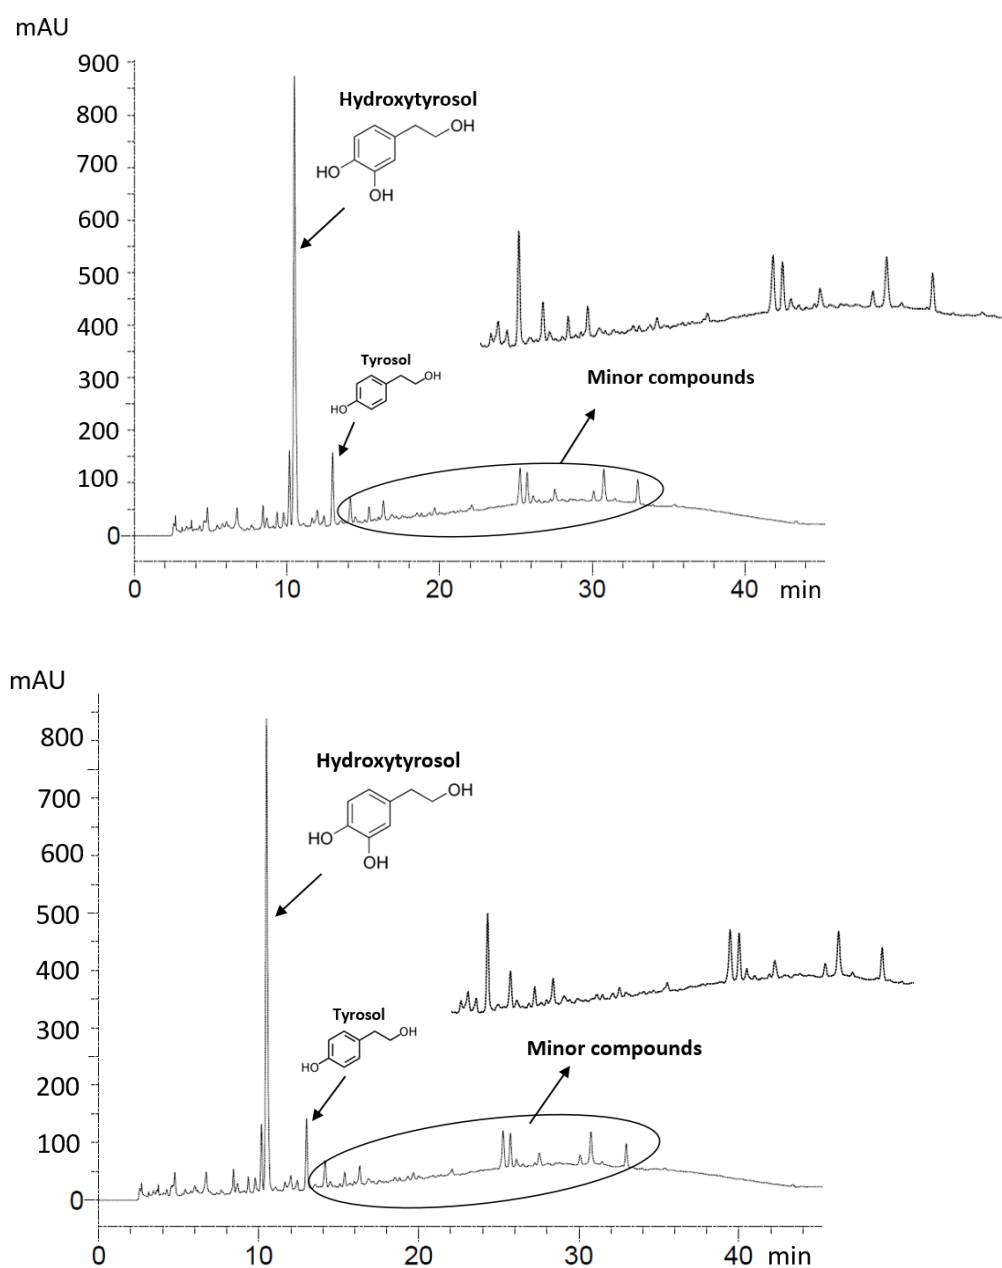

**Figure S2.** HPLC chromatogram (280 nm) of the aqueous extract obtained from pelletized (a) and milled (b) exhausted olive pomace after ultrasound-assisted water extraction at: 80% amplitude, 16 min and 11.5% solid loading (*w/v*).

**Table S1.** F-ratio and p-value obtained for the operational parameters when the increment of temperature was evaluated as response variable in the Box–Behnken design for the ultrasound-assisted water extraction of exhausted olive pomace.

| Reponse variable | $\Delta T$ |          |
|------------------|------------|----------|
|                  | F-Ratio    | P-Value  |
| A:Amplitude      | 470.80     | < 0.0001 |
| t:Time           | 862.70     | < 0.0001 |
| B:Solids         | 0.55       | 0.4838   |
| AA               | 28.22      | 0.0011   |
| At               | 3.17       | 0.1182   |
| AB               | 0.78       | 0.4062   |

|    |        |          |
|----|--------|----------|
| tt | 178.98 | < 0.0001 |
| tB | 0.39   | 0.5542   |
| BB | 1.87   | 0.2133   |

**Table S2.** Statistical parameter values obtained for the extraction yield and concentration of maslinic acid and oleanolic acid after the ethanolic extraction (solid loading at 10%, *w/v*) of the extracted solids from exhausted olive pomace obtained after the application of ultrasound-assisted water extraction.

| Variable | Yield (%) |         | Maslinic acid (g/L) |         | Oleanolic acid (g/L) |         |
|----------|-----------|---------|---------------------|---------|----------------------|---------|
|          | F-Ratio   | P-Value | F-Ratio             | P-Value | F-Ratio              | P-Value |
| A        | 6.60      | 0.0371  | 1.39                | 0.2777  | 0.42                 | 0.5398  |
| t        | 2.84      | 0.1356  | 5.19                | 0.0568  | 5.54                 | 0.0508  |
| B        | 0.89      | 0.3779  | 3.65                | 0.0978  | 2.19                 | 0.1822  |
| AA       | 0.59      | 0.4660  | 0.048               | 0.8323  | 0.015                | 0.9071  |
| At       | 0.047     | 0.8348  | 0.0004              | 0.9847  | 0.0008               | 0.9784  |
| AB       | 0.15      | 0.7064  | 2.24                | 0.1780  | 3.93                 | 0.0878  |
| tt       | 0.0096    | 0.9247  | 5.32                | 0.0544  | 6.28                 | 0.0407  |
| tB       | 1.19      | 0.3110  | 0.11                | 0.7497  | 0.25                 | 0.6325  |
| BB       | 2.05      | 0.1954  | 2.59                | 0.1518  | 1.99                 | 0.2014  |

A, Amplitude (%); t, extraction time (min); B, solid loading (% *w/v*).
